# Supplementary material
Source: PubMed Central journal article supplement (PMC55858)
Supplement: nar_29_16_3289__1.pdf [file nar_29_16_3289__1.pdf]

## SUPPLEMENTARY MATERIAL

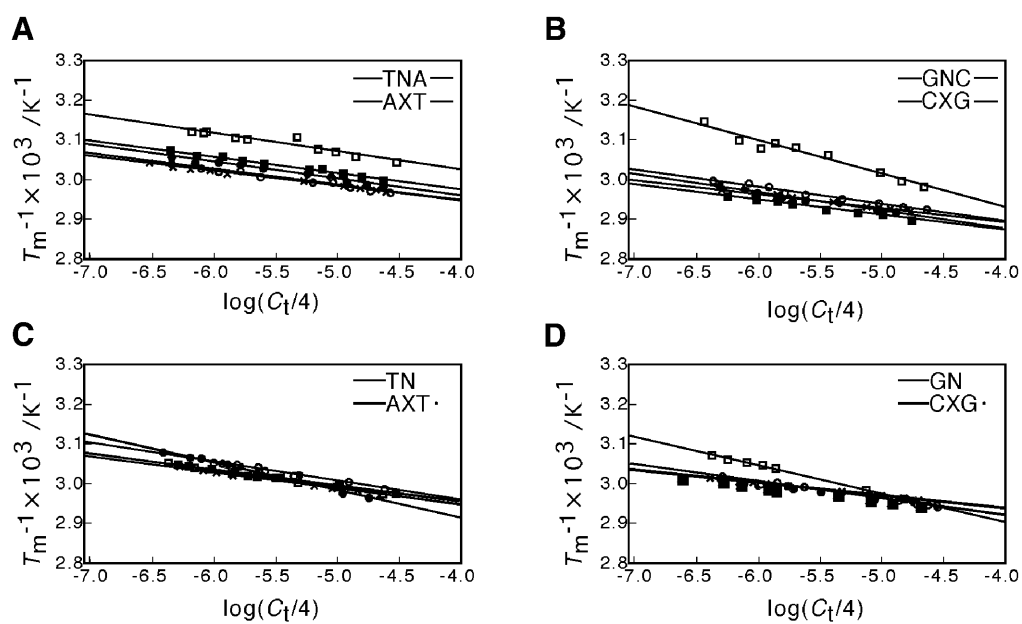

**Figure S1.**  $T_m^{-1}$  versus  $\ln(C_t/4)$  plot for determination of the thermodynamic parameters. (A–D) Results for the sequences [1], [2], [3] and [4] in Figure 1, respectively. Data for the duplexes having A–T, A\*–A, A\*–G, A\*–C and A\*–T base pair as X–N are shown as curves drawn by cross, open square, filled square, open circle and filled circle, respectively.
